# Supplementary material
Source: HighWire-hosted journal article supplement (https://bjgpopen.org/highwire/filestream/2270/field_highwire_adjunct_files/0/bjgpopen19X101666_Supp.pdf)
Supplement: bjgpopen19X101666_Supp.pdf [file bjgpopen19X101666_Supp.pdf]

**Figure S1:** Mean (standard error) for (a) Decisional Conflict Scale (DCS) scores, (b) Edinburgh Postnatal Depression Scale (EPDS) scores and (c) State Trait Anxiety Inventory (STAI) scores at baseline and 4-week/long-term follow-up

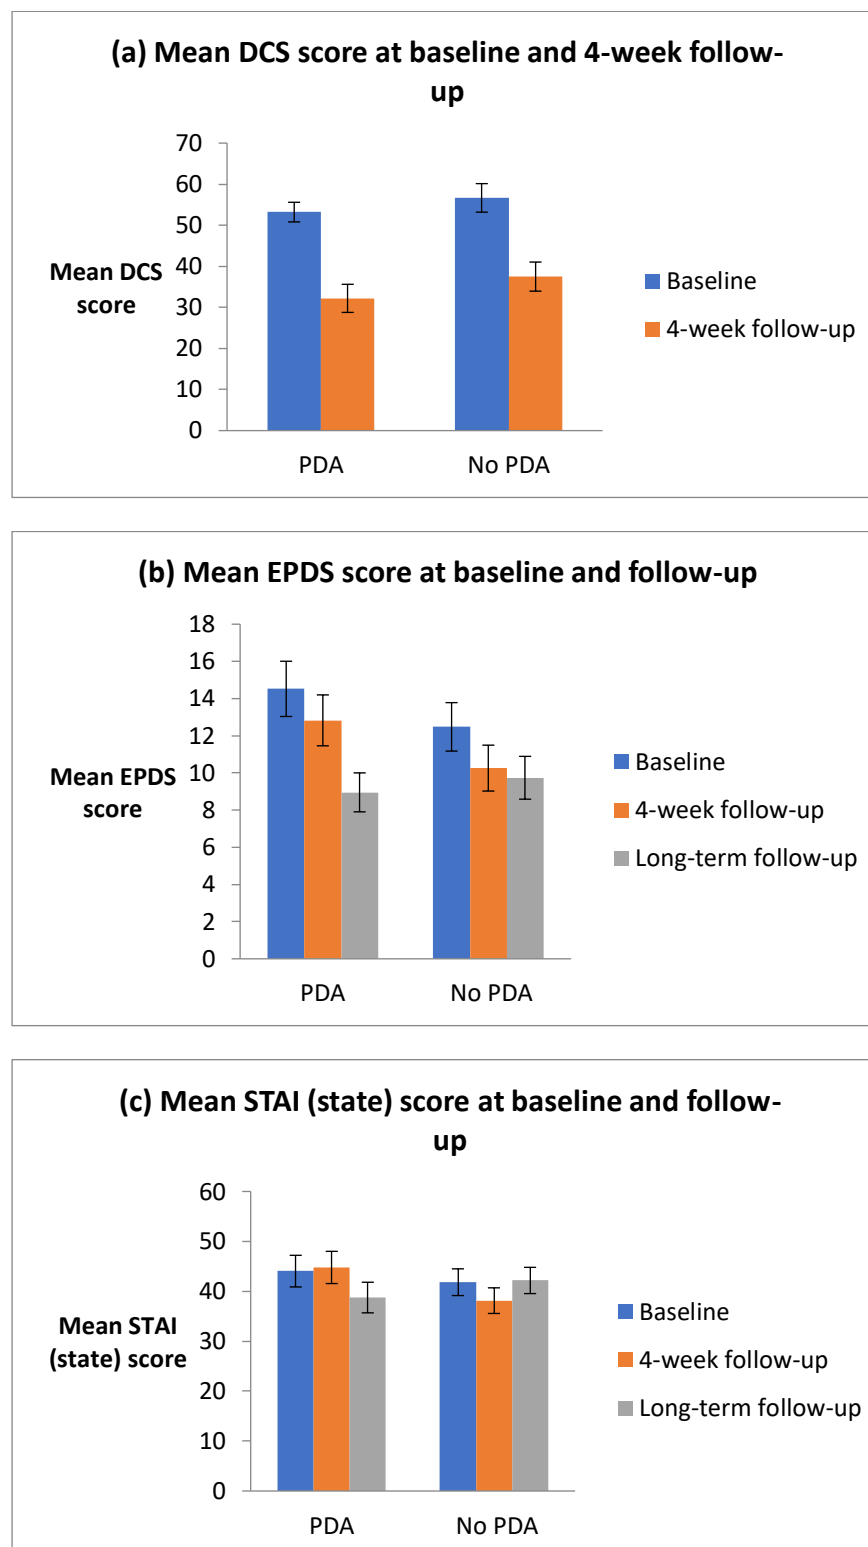

*N* for baseline & T1 (4-week follow-up) for all outcomes: PDA=23, no PDA=23

*N* for T2 (long-term follow-up): for EPDS scores PDA=21, no PDA=23; for STAI scores PDA=20, no PDA=23
